# Supplementary material
Source: Elsevier journal article supplement (https://www.sciencedirect.com/science/article/pii/S1695403322002181)
Supplement: mmc1 [file S1695403322002181:mmc1.doc]

**ANEXO 1. PREGUNTAS DE INVESTIGACIÓN.**

| PREGUNTAS |
| --- |
| COMPETENCIAS DEL PERSONAL |
| 1. ¿Qué requisitos deben cumplir los profesionales no anestesiólogos que realizan PSA? |
| 1. ¿Qué requisitos debe cumplir el personal de apoyo que realiza PSA? |
| 1. ¿Cuántos profesionales se recomiendan para llevar a cabo un PSA? |
| CAPACITACIÓN DEL PERSONAL |
| 1. ¿Cómo obtener la capacitación en detectar pacientes susceptibles o candidatos a PSA por profesional no anestesiólogo? |
| 1. ¿Cómo obtener la capacitación en conocimientos de estrategias farmacológicas de sedantes y analgésicos? |
| 1. ¿Cómo obtener la capacitación en conocimientos acerca del instrumental de monitorización e interpretación de parámetros? |
| 1. ¿Cómo obtener la capacitación práctica en manejo de vía aérea? |
| 1. ¿Cómo obtener la capacitación en reconocimiento de complicaciones de la sedoanalgesia y su resolución? |
| 1. ¿Cómo obtener la capacitación en conocimientos y habilidades en RCP? |
